# Supplementary material
Source: PubMed Central journal article supplement (PMC4310793)
Supplement: NIHMS634108-supplement-supplement_1.pdf [file NIHMS634108-supplement-supplement_1.pdf]

**Supplemental Table 1: Different discretionary activities, per 20 min/day increase, <sup>a</sup> and 12-year relative change in body weight (kg) from 1996-2008 among 10,500 men in the Health Professionals Follow-up Study**

| Variable                                     | TV watching          | Moderate-to-vigorous aerobic activity <sup>b</sup> | Weight training        | Other activities <sup>b</sup> |
|----------------------------------------------|----------------------|----------------------------------------------------|------------------------|-------------------------------|
| <b>Body weight change (1996-2008) (kg)</b>   |                      |                                                    |                        |                               |
|                                              | <b>β0 (95%CI)</b>    | <b>β1 (95%CI)</b>                                  | <b>β2 (95%CI)</b>      | <b>β3 (95%CI)</b>             |
| Crude model <sup>c</sup>                     | 0.05<br>(0.02, 0.08) | -0.19<br>(-0.24, -0.13)                            | -0.20<br>(-0.41, 0.01) | -0.17<br>(-0.12, 0.09)        |
| Multivariate-adjusted model (a) <sup>d</sup> | 0.05<br>(0.02, 0.08) | -0.23<br>(-0.29, -0.17)                            | -0.21<br>(-0.44, 0.01) | -0.02<br>(-0.13, 0.09)        |

<sup>a</sup> Each regression coefficient (95% CI) represents a comparison of body weight change (in kg) for every 20 min/day increase in the predictor variable, not restricting total PA time, nor controlling the displacement of other activity time.

<sup>b</sup> Moderate-to-vigorous aerobic activity included brisk/ very brisk walking; jogging, running, bicycling, lap swimming, tennis, squash or racquetball, calisthenics, rowing, and stair or ski machine; other activities included heavy outdoor work (e.g. digging, chopping), and stair climbing.

<sup>c</sup> The crude model was adjusted for baseline (1996) age (years), height (m), and body weight (kg) (all *continuous*), and included 4 main exposure mutually adjusted for each other: TV watching, moderate-to-vigorous physical activity, weight training, and other activities (all continuous, min/day) (all in 2008)

<sup>d</sup> The multivariate model (*also called partition model*) was adjusted for baseline (1996) age (years), height (m), and body weight (kg) (all *continuous*); total average alcohol intake (1994, 2006); sugar-sweetened beverage intake (1994, 2006); percent energy of trans-fat (1994, 2006); energy-adjusted fibers (1994, 2006) (g/day), energy-adjusted glycemic load (1994, 2006); smoking (1996, 2008), anti-depressant intake (1996, 2008), percent energy of protein intake, (1994, 2006), sleep duration (2000, 2008), and slow walking (1996, 2008) (min/day, continuous) in addition to TV watching, moderate-to-vigorous aerobic activity, weight training, and other activities (all in 1996) (*all continuous, min/day*).
